# Supplementary material for: Microwave Modification of Quinoa Grains at Constant and Varying Water Content Modulates Changes in Structural and Physico-Chemical Properties of the Resulting Flours
Source: Foods. 2023 Mar 27;12(7):1421. doi: 10.3390/foods12071421 (PMC10093526; doi:10.3390/foods12071421)
Supplement: Supplementary file 1 [file foods-12-01421-s001.zip › foods-2249792-supplementary.pdf]

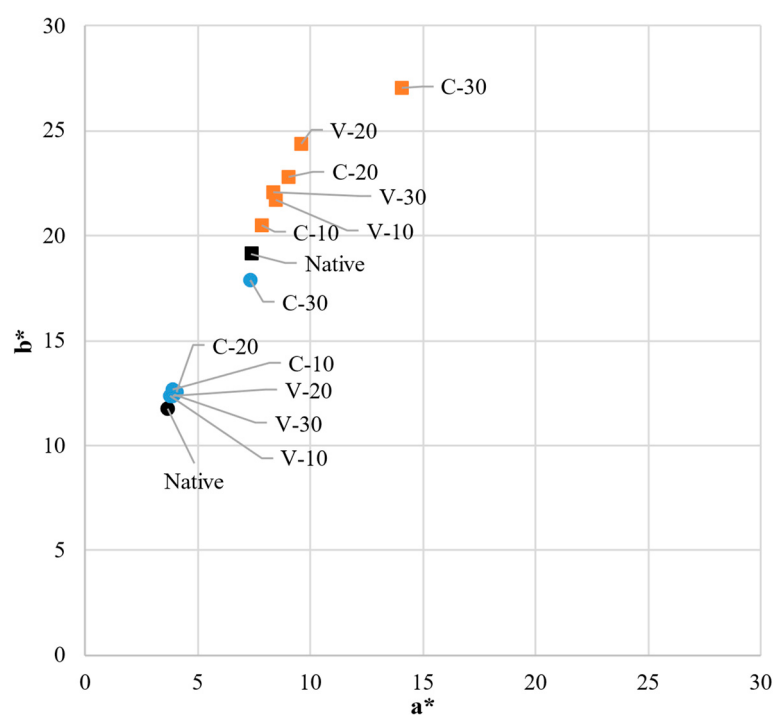

**Figure S1.**  $a^*$ - $b^*$  chromatic diagram of native (black) and microwaved-quinoa grains (orange, ■) and of flours obtained after milling the grains (blue, ●). V-10, V-20, V-30, C-10, C-20, and C-30: samples obtained from microwaved quinoa grains with 10%, 20%, and 30% water content, in systems with variable (V) and constant (C) water content, respectively.

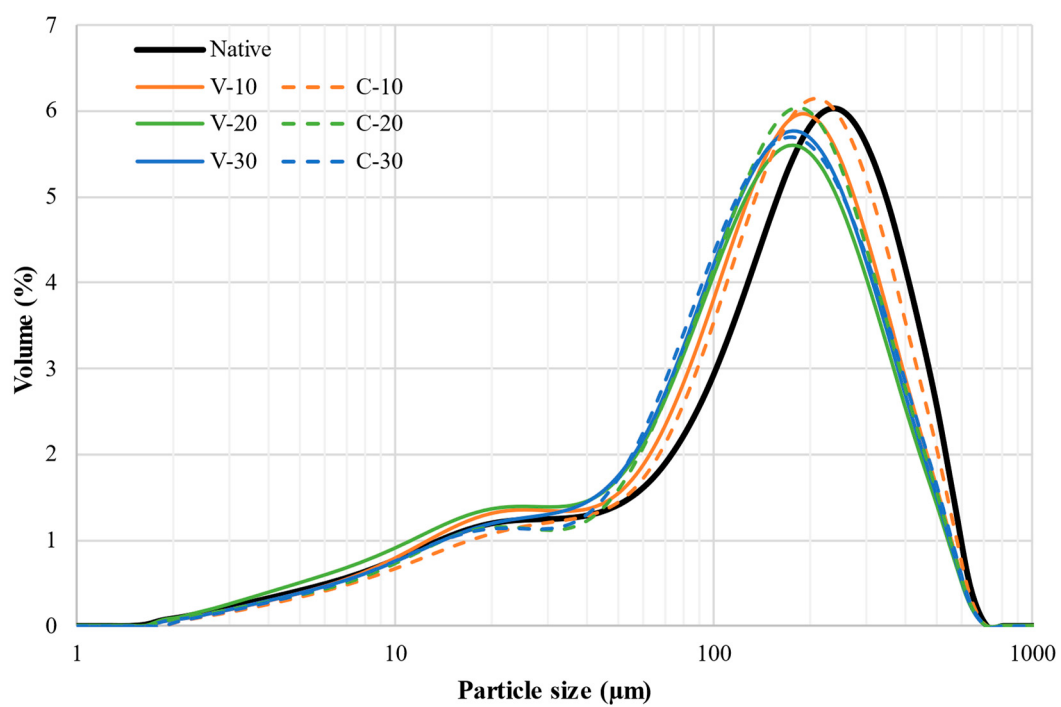

**Figure S2.** Particle size distribution of untreated flour (Native) and flours obtained from microwaved grains with 10, 20, and 30% water content in systems with variable (V) and constant (C) water content.

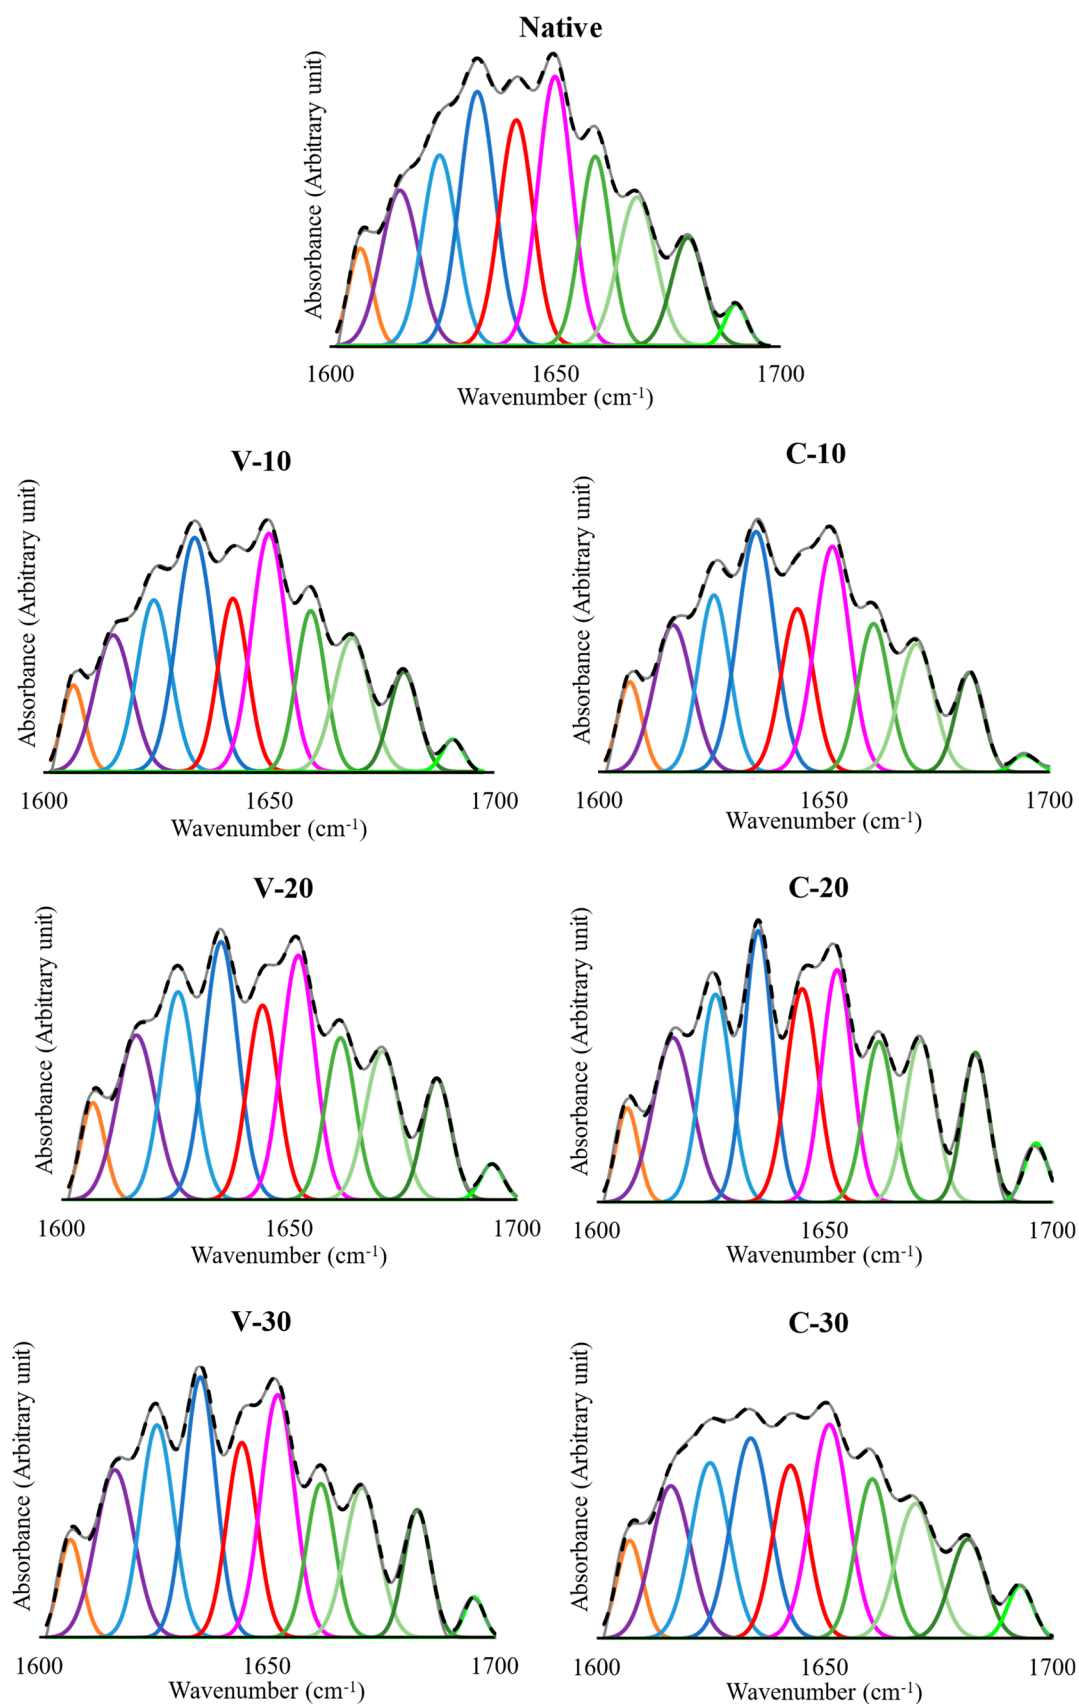

**Figure S3.** Deconvoluted Amide I bands of untreated flour (Native) and flours obtained from microwaved grains with 10, 20, and 30% water content in systems with variable (V) or constant (C) water content. Curve fitting carried out assuming Gaussian band shapes for deconvoluted components. The deconvoluted FTIR spectra is represented by a grey solid line, and the cumulative fitted curve by a black discontinuous one.
